# Supplementary material
Source: PubMed Central journal article supplement (PMC3567493)
Supplement: emboj2012339s1.pdf [file emboj2012339s1.pdf]

Supplementary Table III - Overall numbers of genes upregulated or downregulated more than 2 fold in *teb1-1* compared to wt.

|                                      | 25 °C | 36 °C | Both temperatures |
|--------------------------------------|-------|-------|-------------------|
| Genes upregulated more than 2 fold   | 244   | 224   | 152               |
| Genes downregulated more than 2 fold | 84    | 41    | 29                |

Supplementary Table IV - Iron metabolism genes downregulated in *teb1-1* strain at 25°C and 36°C

| <i>Iron metabolism gene</i> | Gene expression compared to wt (microarray cells 25°C) | Gene expression compared to wt (microarray cells 36°C) |
|-----------------------------|--------------------------------------------------------|--------------------------------------------------------|
| <i>str1</i>                 | 0.293                                                  | 0.177                                                  |
| <i>str3</i>                 | 0.214                                                  | 0.1395                                                 |
| <i>fip1</i>                 | 0.4485                                                 | 0.4705                                                 |
| <i>frp1</i>                 | 0.212                                                  | 0.2215                                                 |

Supplementary Table V – Histone average expression levels in *teb1-1* strain at 25°C and 36°C

| Histone genes     | Gene expression compared to wt (microarray – cells at 25°C) | Gene expression compared to wt (microarray – cells at 36°C) |
|-------------------|-------------------------------------------------------------|-------------------------------------------------------------|
| <i>hta1</i>       | 0.77                                                        | 1.022                                                       |
| <i>htb1</i>       | 0.6025                                                      | 0.697                                                       |
| <i>hta2</i>       | 0.286                                                       | 0.3395                                                      |
| h3.1: <i>hht1</i> | 0.3915                                                      | 0.4505                                                      |
| h3.2: <i>hht2</i> | 0.4215                                                      | 0.5745                                                      |
| h3.3: <i>hht3</i> | 0.3135                                                      | 0.37                                                        |
| h4.1: <i>hhf1</i> | 0.321                                                       | 0.3465                                                      |
| h4.2: <i>hhf2</i> | 0.409                                                       | 0.5155                                                      |
| h4.3: <i>hhf3</i> | 0.4115                                                      | 0.429                                                       |

# Figure S1

## A

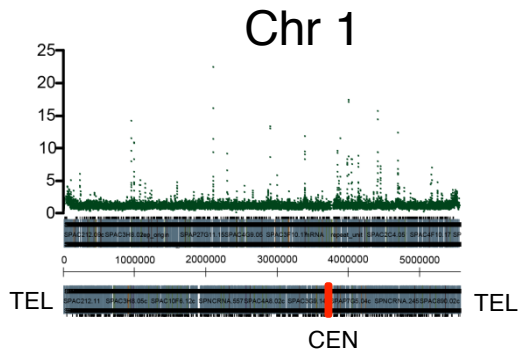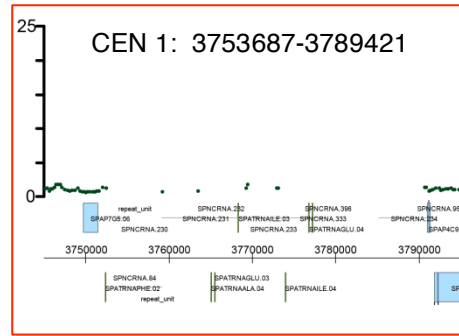

## B

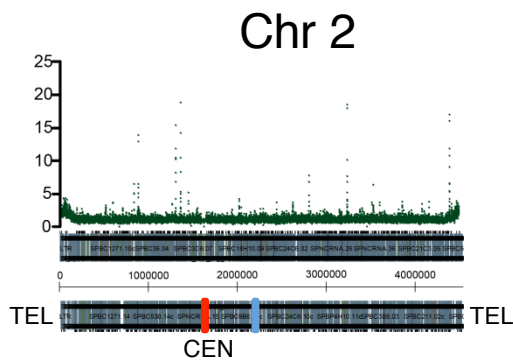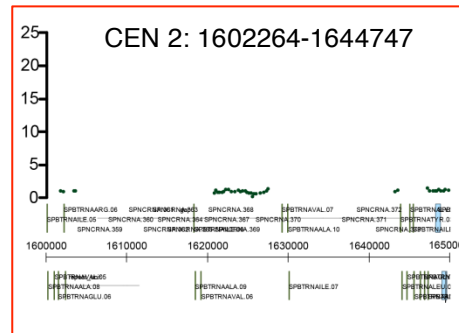

## C

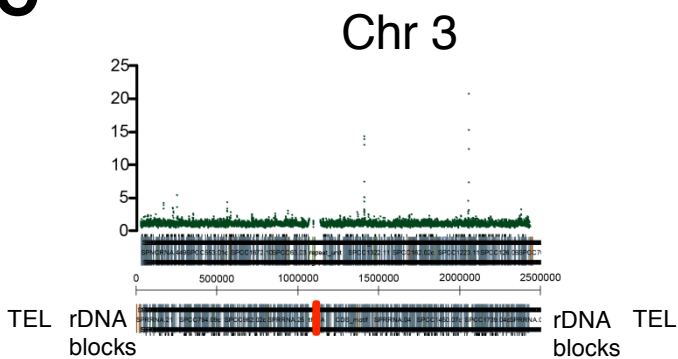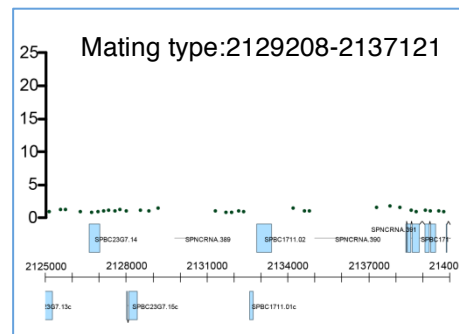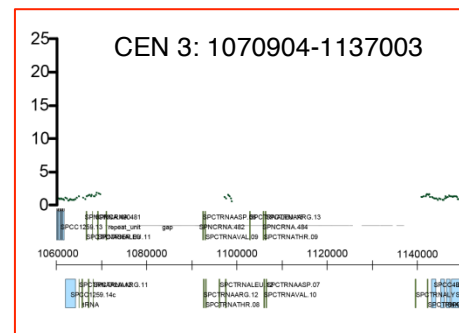

Figure S2

**A**

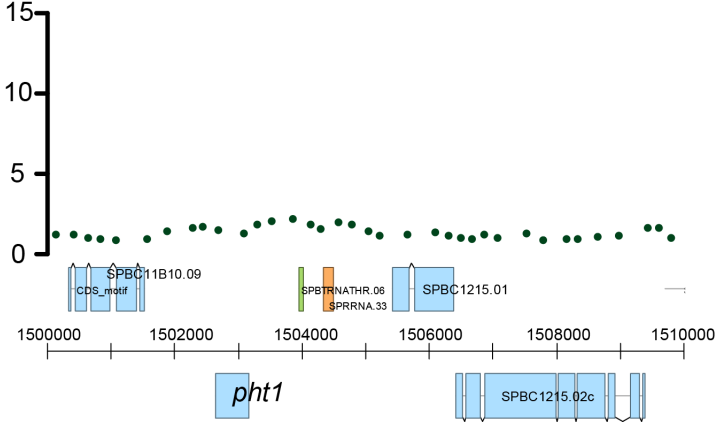

**B**

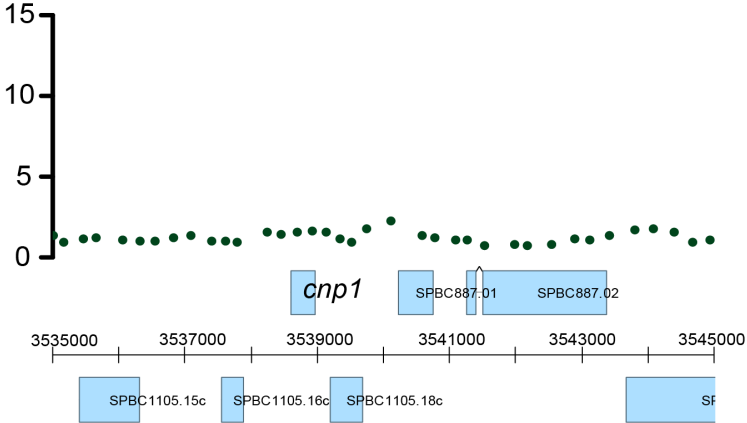

**C**

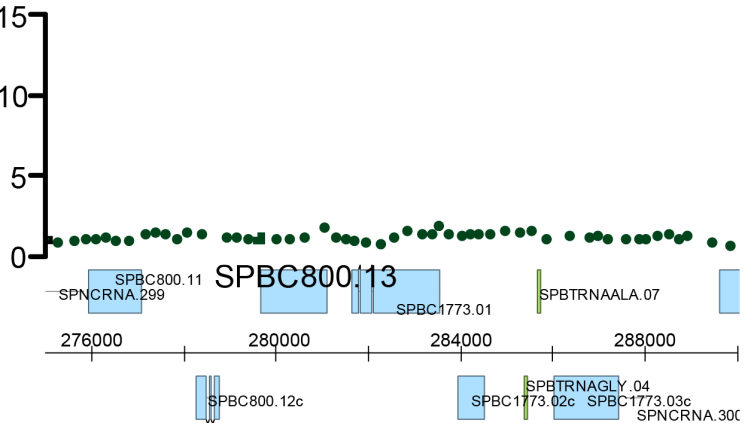

# Figure S3

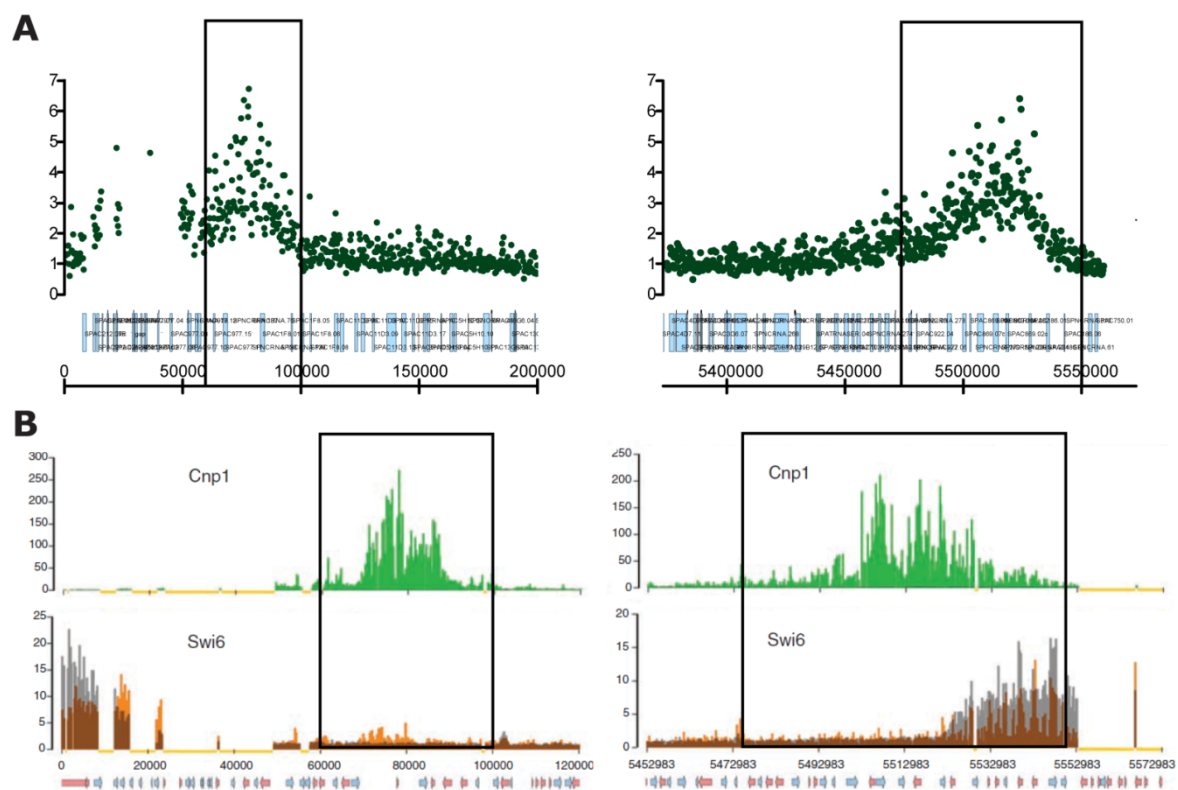

Figure S4

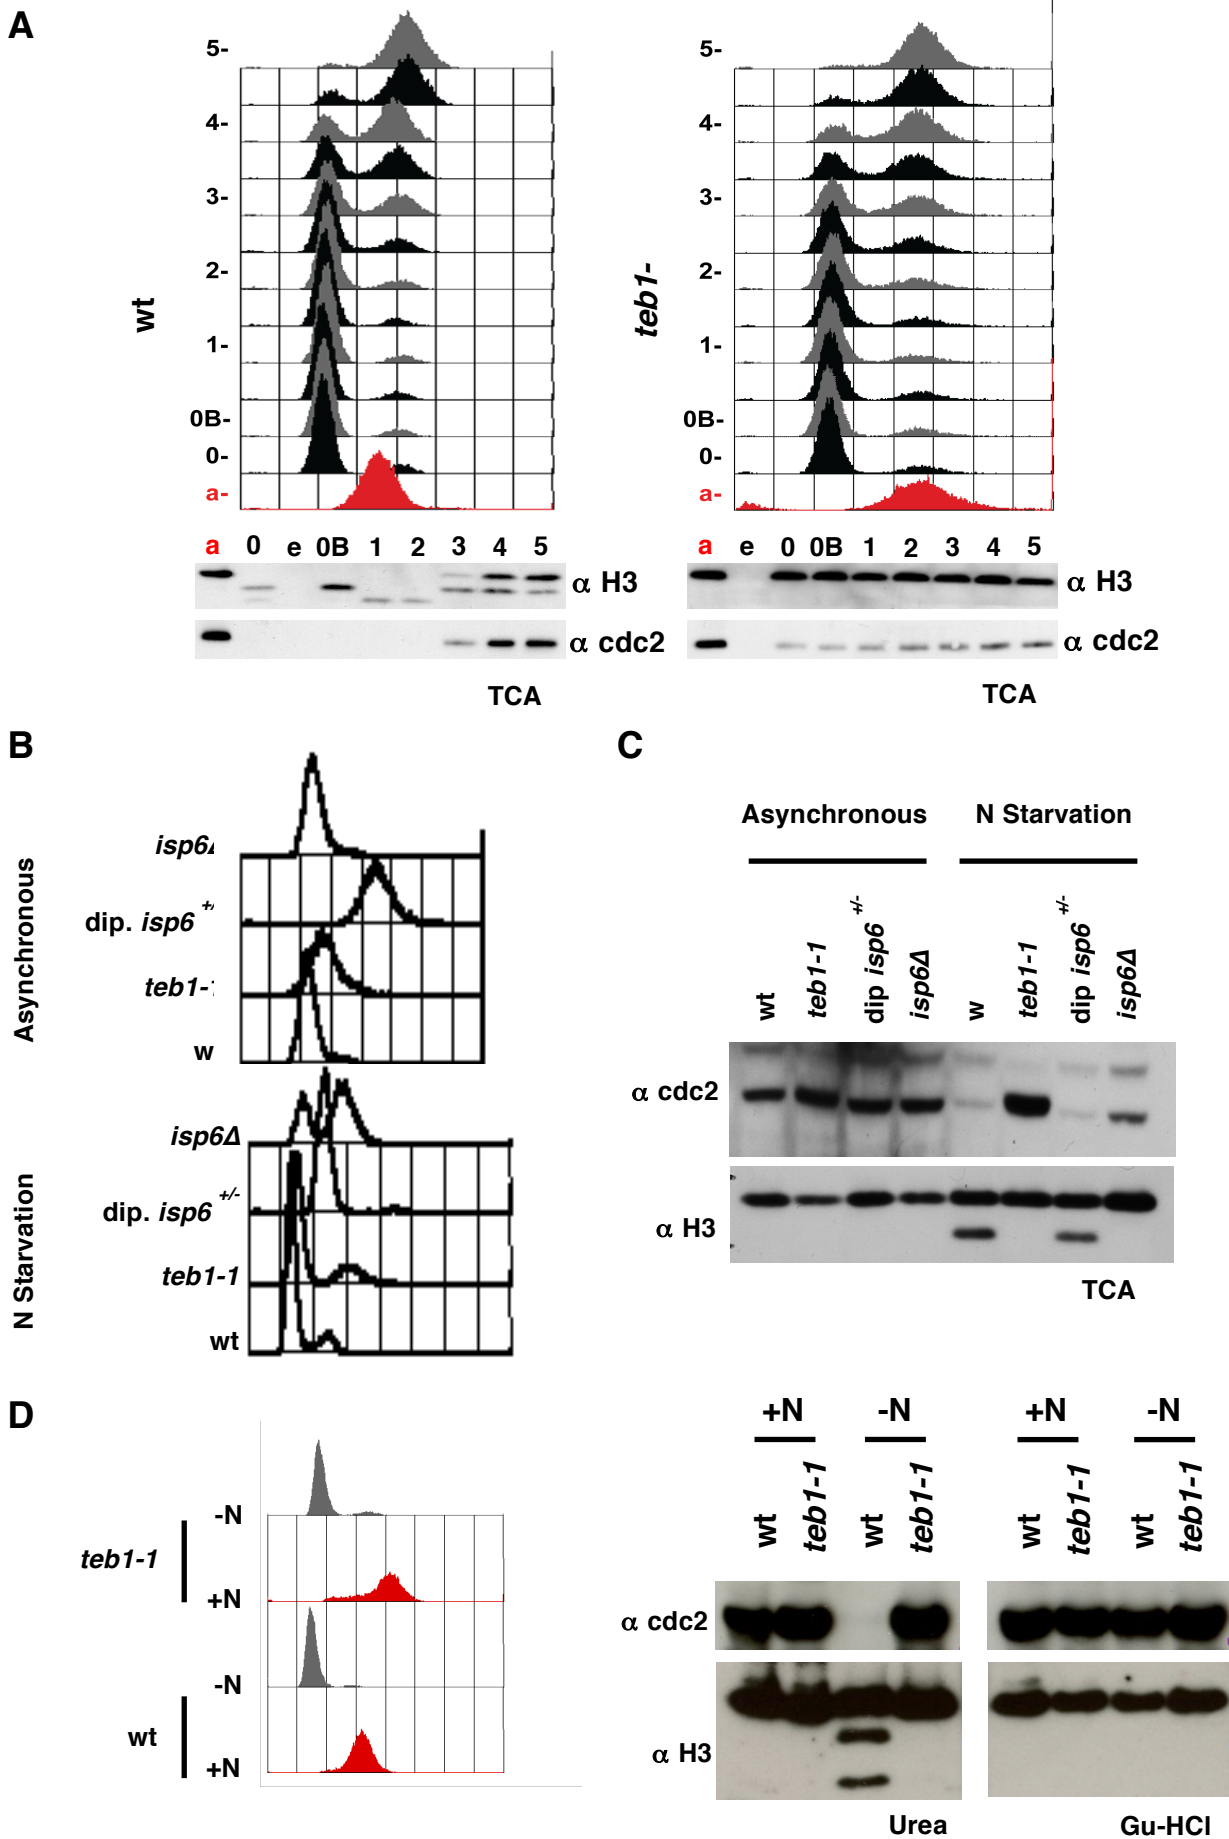

## Supplementary Figure Legends

**Figure S1. *Teb1* binds specific genomic loci.** Representation of ChIP-chip data demonstrating *Teb1* binding to specific regions across the genome, and the absence of binding at the non-repetitive regions of the centromere. Repetitive regions were not included in the analysis as these sequences are absent from the microarray data. (A) *Teb1* binding at Chr 1 and its centromere (B) *Teb1* binding on Chr 2, which contains also the mating type locus. (C) *Teb1* binding on Chr 3.

**Figure S2. *Teb1* does not bind promoters of the histone variants** (A) *pht1* (H2A variant); (B) *cnp1* and (C) SPBC800.13 (H4 variant).

**Figure S3. *Teb1* binds the same regions near the ends of Chr I that are bound by CENP-A upon neocentromere formation.** (A) Representation of ChIP-chip data highlighting *Teb1* binding near the left and right termini of Chr 1. (B) Sites of *Cnp1* or *Swi6* binding after centromere disruption and neo-centromere formation on Chr 1 (from *Ishii et al*, 2008). Boxes highlighting regions of the left and right arms depict the same positions shown in the boxes in (A), allowing direct comparison.

**Figure S4. Histone H3 is degraded in a *Teb1* and *Isp6*-dependent manner during extraction of G1-arrested cells, but not extracted with Gu-HCl.** (A) Top: FACS analysis of wt and *teb1-1* cells arrested in G1 by nitrogen starvation for 16h at 25°C, shifted to 36°C for 1.5h, re-fed to allow resumption of growth and sampled every 30 min for 5 hours. Bottom: Western blot of TCA extracts from the following: (a) asynchronously growing cells; (0) cells starved for nitrogen for 16h; (OB) the same cells 1.5h at 36 °C, before re-feeding; (1 through 5) following re-feeding for 1 to 5 hours as indicated. Both wt and *teb1-1* cells recover efficiently from G1 arrest. Lane (e) was used for the protein marker. Both *Cdc2* proteolysis and histone



H3 clipping occur in extracts of wt G1 arrested cells (left panel). However, neither histone H3 clipping nor Cdc2 proteolysis occur in extracts of *teb1-1* cells (right panel). **(B)** Isp6 is required for histone clipping in extracts of G1-arrested cells. Asynchronous or nitrogen starved (16 hours) cultures of cells of the indicated genotypes were analysed by FACS. **(C)** Western blot analysis reveals that impairment of Isp6 function abolishes histone clipping in these TCA extracts. **(D)** Histone H3 clipping is detected in extracts of nitrogen starved cells prepared in the presence of 8M Urea but not in the presence of Gu-HCl.
