# Supplementary material
Source: PubMed Central journal article supplement (PMC3567493)

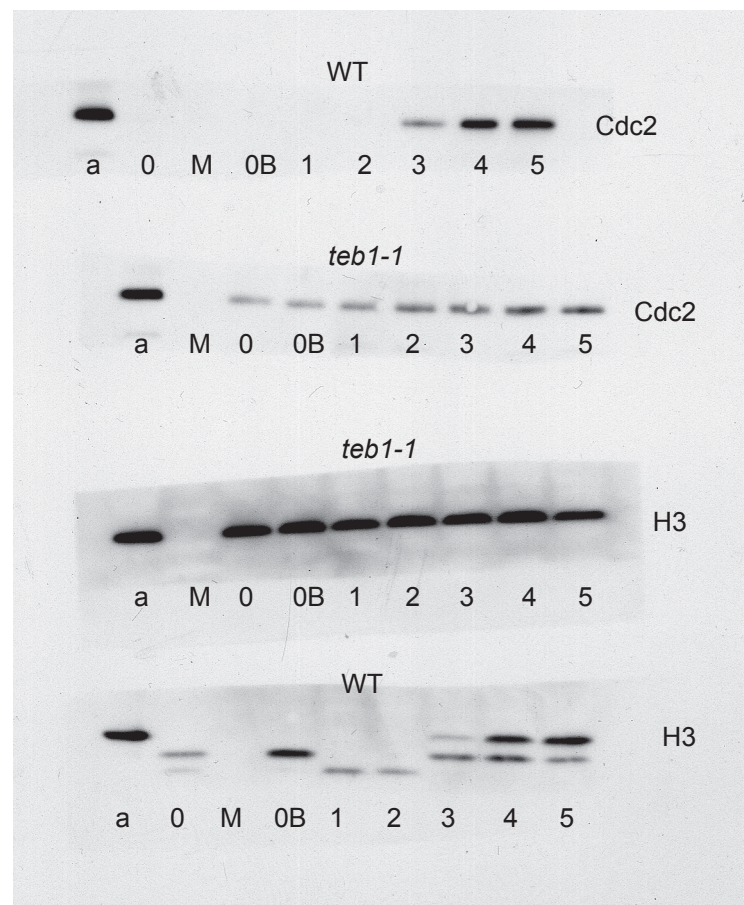

Supplement: emboj2012339dfs4.pdf [file emboj2012339dfs4.pdf]
